# Supplementary material for: Seroconversion Rates After the Second COVID-19 Vaccination in Patients With Systemic Light Chain (AL) amyloidosis
Source: PubMed Central journal article supplement — Hemasphere. 2022 Feb 15;6(3):e688. doi: 10.1097/HS9.0000000000000688 (PMC8849404; doi:10.1097/hs9.0000000000000688), 2022-02-15
Supplement: hs9-6-e688-s001.pdf [file hs9-6-e688-s001.pdf]

## Supplementary Information:

### **Seroconversion rates after the second COVID-19 vaccination in patients with systemic light chain (AL) amyloidosis**

*Nora Liebers<sup>1,2\*</sup>, Stefan O. Schönland<sup>1</sup>, Claudius Speer<sup>3</sup>, Dominic Edelmann<sup>4</sup>, Paul Schnitzler<sup>5</sup>, Hans-Georg Kräusslich<sup>5</sup>, Carsten Mueller-Tidow<sup>1,2</sup>, Ute Hegenbart<sup>1</sup>, Sascha Dietrich<sup>1,2,6</sup>*

<sup>1</sup> Department of Medicine V, Heidelberg University Hospital, Heidelberg, Germany

<sup>2</sup> National Center for Tumor Diseases Heidelberg, Heidelberg, Germany

<sup>3</sup> Department of Nephrology, Heidelberg University Hospital, Heidelberg, Germany

<sup>4</sup> German Cancer Research Center, Division of Biostatistics, Heidelberg, Germany

<sup>5</sup> Department of Infectious Diseases, Virology, Heidelberg University Hospital, Heidelberg, Germany

<sup>6</sup> European Molecular Biology Laboratory (EMBL), Heidelberg, Germany

\* Corresponding author

## **SUPPLEMENTAL TABLES**

**Table S1: Detailed comparison of positive and negative anti-SARS-CoV-2-S1 antibody cohorts after COVID-19 vaccination**

|                                                                               | <b>Positive antibody result (N=102)</b> | <b>Negative antibody result (N=15)</b> | <b>P-value*</b> |
|-------------------------------------------------------------------------------|-----------------------------------------|----------------------------------------|-----------------|
| Age, y                                                                        | 64 [44, 84]                             | 65 [55, 82]                            |                 |
| Male Sex                                                                      | 56 (55 %)                               | 10 (67 %)                              |                 |
| Lambda subtype                                                                | 85 (83 %)                               | 11 (73 %)                              |                 |
| Underlying clonal disease                                                     |                                         |                                        |                 |
| MGCS                                                                          | 30 (29 %)                               | 4 (27 %)                               |                 |
| Smoldering myeloma                                                            | 64 (63 %)                               | 11 (73 %)                              |                 |
| Multiple myeloma                                                              | 8 (8 %)                                 | 0 (0 %)                                |                 |
| Interval between initial diagnosis of AL amyloidosis and first vaccination, y | 3.9 [0.01, 22.2]                        | 2 [0.06, 8.3]                          |                 |
| BMPC infiltration at first diagnosis in %                                     | 10.0 [3, 75]¶                           | 11 [4, 30]                             |                 |
| >2 organ involved                                                             | 51 (50 %)                               | 6 (40 %)                               |                 |
| Cardiac involvement                                                           | 75 (74 %)                               | 11 (73 %)                              |                 |
| Renal involvement                                                             | 61 (60 %)                               | 11 (73 %)                              |                 |
| Hepatic involvement                                                           | 20 (20 %)                               | 2 (13 %)                               |                 |
| Neuropathic involvement                                                       | 25 (25 %)                               | 6 (40 %)                               |                 |
| Gastrointestinal involvement                                                  | 21 (21 %)                               | 3 (20 %)                               |                 |

|                                                                                                        | Positive antibody result (N=102) | Negative antibody result (N=15) | P-value* |
|--------------------------------------------------------------------------------------------------------|----------------------------------|---------------------------------|----------|
| Soft tissue involvement                                                                                | 41 (40 %)                        | 7 (47 %)                        |          |
| On active therapy at time of vaccination                                                               | 36 (35 %)                        | 9 (60 %)                        |          |
| Interval between last treatment and first vaccination (patients with current or prior treatment), days | 248 [0, 6790]                    | 1.50 [0, 646]                   | 0.03     |
| Prior autoHCT                                                                                          | 26 (25 %)                        | 3 (20 %)                        |          |
| Prior alloHCT                                                                                          | 2 (2 %)                          | 0 (0 %)                         |          |
| Lines of treatment                                                                                     | 2 [0, 8]                         | 2 [0, 7]                        |          |
| Disease in hematologic remission (CR or VGPR)                                                          | 67 (66 %)                        | 6 (40 %)                        |          |
| Prior/current Daratumumab                                                                              | 47 (46 %)                        | 9 (60 %)                        |          |
| Prior/current Proteasom inhibitors                                                                     | 85 (83 %)                        | 11 (73 %)                       |          |
| Prior/current IMiDs                                                                                    | 39 (38 %)                        | 5 (33 %)                        |          |
| Prior/current Melphalan                                                                                | 50 (49 %)                        | 9 (60 %)                        |          |
| WBC, /nl                                                                                               | 6.69 [2.77, 14.9]                | 6.97 [4.05, 14.1]               |          |
| Lymphocyte count, /nL                                                                                  | 1.5 [0.05, 4.4]                  | 1.6 [0.3, 4.6]                  |          |
| IgG in g/L                                                                                             | 7.4 [0.8, 29.1] <sup>†</sup>     | 5.1 [1.9, 9.1] <sup>†</sup>     | 0.03     |
| IgA in g/L                                                                                             | 1.1 [0.08, 11.3] <sup>‡</sup>    | 0.5 [0.2, 2.2] <sup>‡</sup>     |          |
| IgM in g/L                                                                                             | 0.4 [0.08, 7.1] <sup>§</sup>     | 0.3 [0.1, 0.8] <sup>§</sup>     |          |
| dFLC in mg/L                                                                                           | 13.2 [0.300, 443]                | 17.8 [1.50, 460]                |          |
| GFR in mL/min                                                                                          | 56.8 [5.4, 107]                  | 49.8 [3.2, 89.7]                |          |
| Total serum protein in g/L                                                                             | 64.4 [49.6, 82.0]                | 56.1 [38.4, 67.9]               | 0.001    |
| Daily Proteinuria in g/d                                                                               | 0.14 [0.1, 16.7] <sup>††</sup>   | 3.3 [0.1, 15.7] <sup>††</sup>   | 0.04     |
| Serum Albumin in g/L                                                                                   | 43.3 [23.3, 65.7]                | 35.9 [24.7, 46.0]               | 0.001    |
| Patients on dialysis                                                                                   | 9 (9 %)                          | 2 (13 %)                        |          |
| Vaccines                                                                                               |                                  |                                 |          |
| AZD122 (AstraZeneca)                                                                                   | 13 (13 %)                        | 2 (13 %)                        |          |
| BNT162b2 (BioNTech)                                                                                    | 81 (79 %)                        | 13 (87 %)                       |          |
| Heterologous vaccines                                                                                  | 4 (4 %)                          | 0 (0 %)                         |          |
| mRNA-1273 (Moderna)                                                                                    | 4 (4 %)                          | 0 (0 %)                         |          |
| Interval between V1 and V2, days                                                                       | 41.0 [14.0, 89.0]                | 29.0 [18.0, 63.0]               |          |

Data are number of patients (%) or median [range]. Percentages and median with ranges in brackets were calculated for all 102 patients with positive antibody results and all 15 patients with negative antibody results unless otherwise stated in numbers section. P values to test for differences between patients with positive and negative antibody results were calculated by use of Fisher's Exact test for categorical characteristics and the Mann-Whitney test for continuous characteristics. \*For reasons of readability, only statistically significant P values (P < 0.05) are displayed.

Laboratory values were measured at the time of antibody measurement post V2 (+/- 3 months).

¶ 1 patient with positive antibody results not available

† 6 patients with positive antibody results and 3 patients with negative antibody results not available

‡ 18 patients with positive antibody results and 4 patients with negative antibody results not available

§ 20 patients with positive antibody results and 4 patients with negative antibody results not available

†† 15 patients with positive antibody results and 5 patients with negative antibody results not available

The diagnosis of multiple myeloma was defined as the presence of a clonal bone marrow plasma cell percentage  $\geq 10\%$  or a biopsy-proven plasmacytoma and additionally the presence of at least one feature of end-organ damage (CRAB: hypercalcemia, renal failure, anemia, and bone lesions) that can be attributed to the malignant disease.

MGCS, monoclonal gammopathy of clinical significance; BMPC, bone marrow plasma cell; autoHCT, autologous hematopoietic cell transplantation; alloHCT, allogeneic hematopoietic cell transplantation; CR, complete remission; VGPR, very good partial response; IMiDs, immunomodulatory drugs; dFLC, difference between serum free light chains; GFR, glomerular filtration rate; V1, first vaccination; V2, second vaccination

**Supplemental Table S2: anti-SARS-CoV-2-S1 antibody responses after the second COVID-19 vaccination based on the different vaccine regimens**

| Patient cohorts based on antibody levels | BNT162b2 (BioNTech) (N=94) | mRNA-1273 (Moderna) (N=4) | AZD122 (AstraZeneca) (N=15) | Heterologous vaccines (N=4) |
|------------------------------------------|----------------------------|---------------------------|-----------------------------|-----------------------------|
| High responder                           | 35 (37.2%)                 | 2 (50%)                   | 0 (0%)                      | 4 (100%)                    |
| Low responder                            | 46 (48.9%)                 | 2 (50%)                   | 13 (86.7%)                  | 0 (0%)                      |
| Non-responder                            | 13 (13.8%)                 | 0 (0%)                    | 2 (13.3%)                   | 0 (0%)                      |

**Table S3: Univariate analysis for a failure of seroconversion after two COVID-19 vaccinations**

| Characteristic                            | N   | OR          | 95% CI     | p-value |
|-------------------------------------------|-----|-------------|------------|---------|
| Age, per 10 years                         | 117 | 1.10        | 0.55, 2.19 | 0.8     |
| Sex                                       | 117 |             |            |         |
| Female                                    |     | [Reference] |            |         |
| Male                                      |     | 1.64        | 0.54, 5.59 | 0.4     |
| BMPC infiltration at first diagnosis in % | 116 | 1.00        | 0.94, 1.05 | >0.9    |
| >2 organ involved                         | 117 |             |            |         |
| no                                        |     | [Reference] |            |         |
| yes                                       |     | 0.67        | 0.21, 1.98 | 0.5     |
| Lines of treatment, per line              | 117 | 1.18        | 0.84, 1.60 | 0.3     |

| Characteristic                                        | N   | OR          | 95% CI     | p-value          |
|-------------------------------------------------------|-----|-------------|------------|------------------|
| Interval between last treatment and first vaccination | 117 |             |            |                  |
| >3 months                                             |     | [Reference] |            |                  |
| <3 months                                             |     | 4.69        | 1.37, 21.7 | <b>0.024</b>     |
| untreated                                             |     | 4.58        | 0.20, 47.3 | 0.2              |
| Disease in hematologic remission (CR or VGPR)         | 117 |             |            |                  |
| no                                                    |     | [Reference] |            |                  |
| yes                                                   |     | 0.35        | 0.11, 1.04 | 0.063            |
| Prior/current Daratumumab                             | 117 |             |            |                  |
| no                                                    |     | [Reference] |            |                  |
| yes                                                   |     | 1.76        | 0.59, 5.58 | 0.3              |
| Lymphocyte count, per /nL                             | 117 | 0.92        | 0.43, 1.74 | 0.8              |
| IgG, per g/L                                          | 108 | 0.81        | 0.64, 0.98 | <b>0.049</b>     |
| IgA, per g/L                                          | 95  | 0.42        | 0.13, 0.94 | 0.085            |
| IgM, per g/L                                          | 93  | 0.27        | 0.02, 1.21 | 0.2              |
| GFR                                                   | 117 |             |            |                  |
| <60 mL/min                                            |     | [Reference] |            |                  |
| >60 mL/min                                            |     | 0.72        | 0.23, 2.15 | 0.6              |
| dFLC, per mg/L                                        | 117 | 1.00        | 1.00, 1.01 | 0.10             |
| Total serum protein, per decrease of 1 g/L            | 117 | 1.15        | 1.07, 1.26 | <b>&lt;0.001</b> |
| Daily proteinuria, per g/d                            | 97  | 1.25        | 1.07, 1.49 | <b>0.006</b>     |
| Serum albumin, per decrease of 1 g/L                  | 117 | 1.19        | 1.09, 1.32 | <b>&lt;0.001</b> |

Statistically significant results ( $P < 0.05$ ) are bold. For continuous variables, OR is calculated for the increase per unit of the variable if not otherwise stated.

OR, Odds Ratio; CI, Confidence Interval; BMPC, bone marrow plasma cell; CR, complete remission; VGPR, very good partial response; GFR, glomerular filtration rate; dFLC, difference between serum free light chains

**Table S4: Multivariate analysis for a failure of seroconversion after two COVID-19 vaccinations (full case analysis, n=108)**

| Characteristic                                              | OR          | 95% CI     | P-value          |
|-------------------------------------------------------------|-------------|------------|------------------|
| Age, per 10 years                                           | 1.01        | 0.91, 1.13 | 0.8              |
| Dosing interval between both COVID-19 vaccinations, per day | 0.93        | 0.87, 1.00 | 0.052            |
| Vaccine regimen                                             |             |            |                  |
| mRNA-based homolog/heterolog                                | [Reference] |            |                  |
| Vector-based homolog                                        | 2.09        | 0.20, 18.3 | 0.5              |
| Serum albumin, per decrease 1 g/L                           | 1.25        | 1.12, 1.44 | <b>&lt;0.001</b> |
| Lymphocyte count, per /nl                                   | 0.69        | 0.28, 1.50 | 0.4              |
| GFR                                                         |             |            |                  |
| <60 mL/min                                                  | [Reference] |            |                  |
| >60 mL/min                                                  | 0.47        | 0.10, 1.86 | 0.3              |
| Interval between last treatment and first vaccination       |             |            |                  |
| >3 months                                                   | [Reference] |            |                  |
| <3 months                                                   | 6.53        | 1.25, 53.0 | <b>0.044</b>     |
| untreated                                                   | 6.15        | 0.21, 115  | 0.2              |

Statistically significant results ( $P < 0.05$ ) are bold. For continuous variables, OR is calculated for the increase per unit of the variable if not otherwise stated.

OR, Odds Ratio; CI, Confidence Interval; GFR, glomerular filtration rate

**Table S5: Multivariate linear censored regression model (tobit model) of log<sub>10</sub>-transformed anti-SARS-CoV-2-S1 antibody levels after two COVID-19 vaccinations (n=117)**

|                                                             | Regression coefficient | Lower 95% CI | Upper 95% CI | Fold change (FC)* | Lower 95% CI (FC)* | Upper 95% CI (FC)* | P-value          |
|-------------------------------------------------------------|------------------------|--------------|--------------|-------------------|--------------------|--------------------|------------------|
| Age, per 10 years                                           | -0.01                  | -0.32        | 0.29         | 0.97              | 0.48               | 1.97               | 0.940            |
| Dosing interval between both COVID-19 vaccinations, per day | 0.03                   | 0.01         | 0.05         | 1.07              | 1.01               | 1.12               | <b>0.014</b>     |
| Homologous vector-based vaccination                         | -1.48                  | -2.37        | -0.60        | 0.03              | 0.004              | 0.25               | <b>0.001</b>     |
| No treatment within 3 months prior vaccination              | 0.59                   | 0.10         | 1.09         | 3.93              | 1.27               | 12.18              | <b>0.018</b>     |
| Albumin (serum), per 1 g/L                                  | 0.07                   | 0.03         | 0.11         | 1.18              | 1.07               | 1.29               | <b>&lt;0.001</b> |
| Lymphocyte count, per 1/nl                                  | 0.06                   | -0.22        | 0.34         | 1.15              | 0.60               | 2.19               | 0.680            |
| GFR >60 mL/min                                              | 0.49                   | 0.01         | 0.96         | 3.08              | 1.03               | 9.23               | <b>0.044</b>     |

Only data for variables that were included in the final model are shown. In the model, the dependent variable (anti-SARS-CoV-2-S1 antibody level) was log<sub>10</sub>-transformed for normalization. Censoring was applied due to technical detection limits of the anti-SARS-CoV-2-S1 assay (censoring: left=log<sub>10</sub>(0.01), right=log<sub>10</sub>(150)). Left- and right-censoring was necessary for 3 and 37 patients, respectively.

\* Fold change (FC) is calculated via 10<sup>^(Regression coefficient)</sup> and expresses the multiplicative change per one unit of the corresponding variable.
